# Supplementary material for: Efficient Designer Nuclease-Based Homologous Recombination Enables Direct PCR Screening for Footprintless Targeted Human Pluripotent Stem Cells
Source: PubMed Central journal article supplement — Stem Cell Reports. 2014 Jan 14;2(1):107–18. doi: 10.1016/j.stemcr.2013.12.003 (PMC3966116; doi:10.1016/j.stemcr.2013.12.003), 2014-01-14
Supplement: mmc1.pdf [file mmc1.pdf]

**Stem Cell Reports, Volume 2**  
**Supplemental Information**

**Efficient Designer Nuclease-Based Homologous**

**Recombination Enables Direct PCR Screening for**

**Footprintless Targeted Human Pluripotent Stem Cells**

Sylvia Merkert, Stephanie Wunderlich, Christien Bednarski, Jennifer Beier, Alexandra Haase, Anne-Kathrin Dreyer, Kristin Schwanke, Johann Meyer, Gudrun Göhring, Toni Cathomen, and Ulrich Martin

## Supplemental Figures

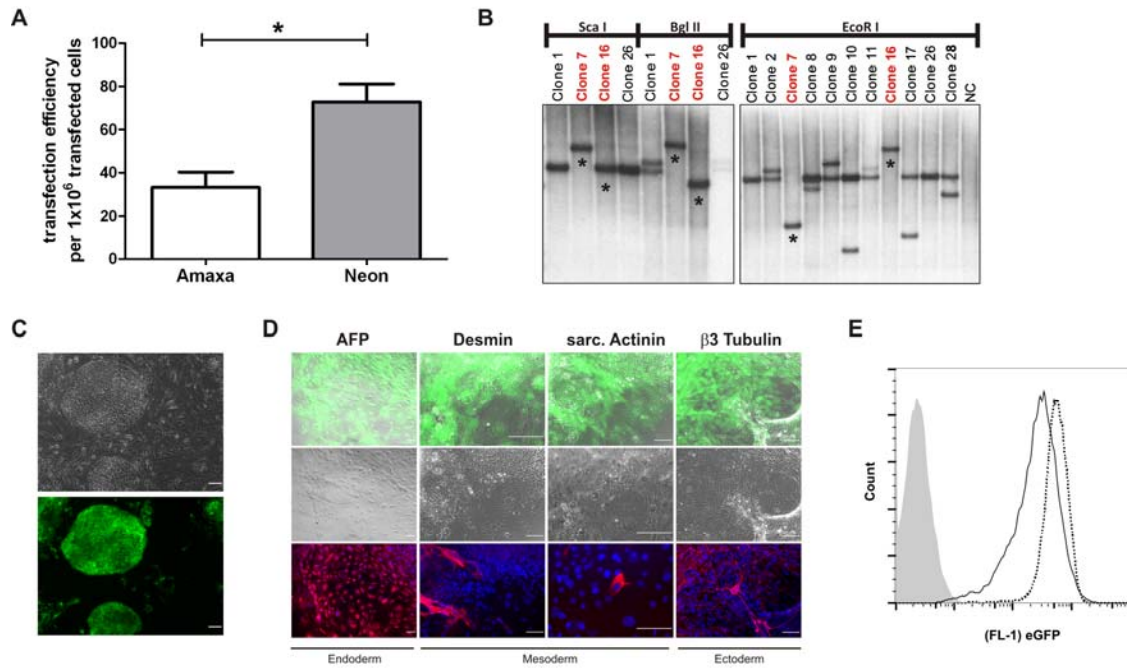

**Figure S1. Optimization of transfection and characterization of hCBiPS2eGFP reporter cell clones, related to Figure 1.** (A) Comparison of transfection efficiencies of hCBiPS2 and hES3 cells using our optimized protocol for the Neon® transfection system versus the optimized protocol of the Amaxa™ Nucleofection system recommended for hPSCs (mean ± SEM of 4 independent experiments). (B) Southern Blot analysis revealed 2 clones (depicted in red) with single eGFP integration. (C) Microscopy images of the transgenic eGFP<sup>POS</sup> iPSC clone hCBiPS2eGFP7 on feeder cells. Scale bars represent 100 μm. (D) Immunostaining of clone hCBiPS2eGFP7 cell derivatives on day 15 of differentiation showed expression of endodermal (AFP), mesodermal (sarc. alpha-Actinin, Desmin) and ectodermal (β3-Tubulin) marker proteins (red). Nuclei are stained with DAPI (blue). Upper pictures show eGFP transgene expression. Scale bars represent 100 μm. (E) Flow cytometric analysis of derivatives of clone hCBiPS2eGFP7 on day 28 of differentiation (continuous line) revealed consistent eGFP expression compared to undifferentiated cells (dotted line).

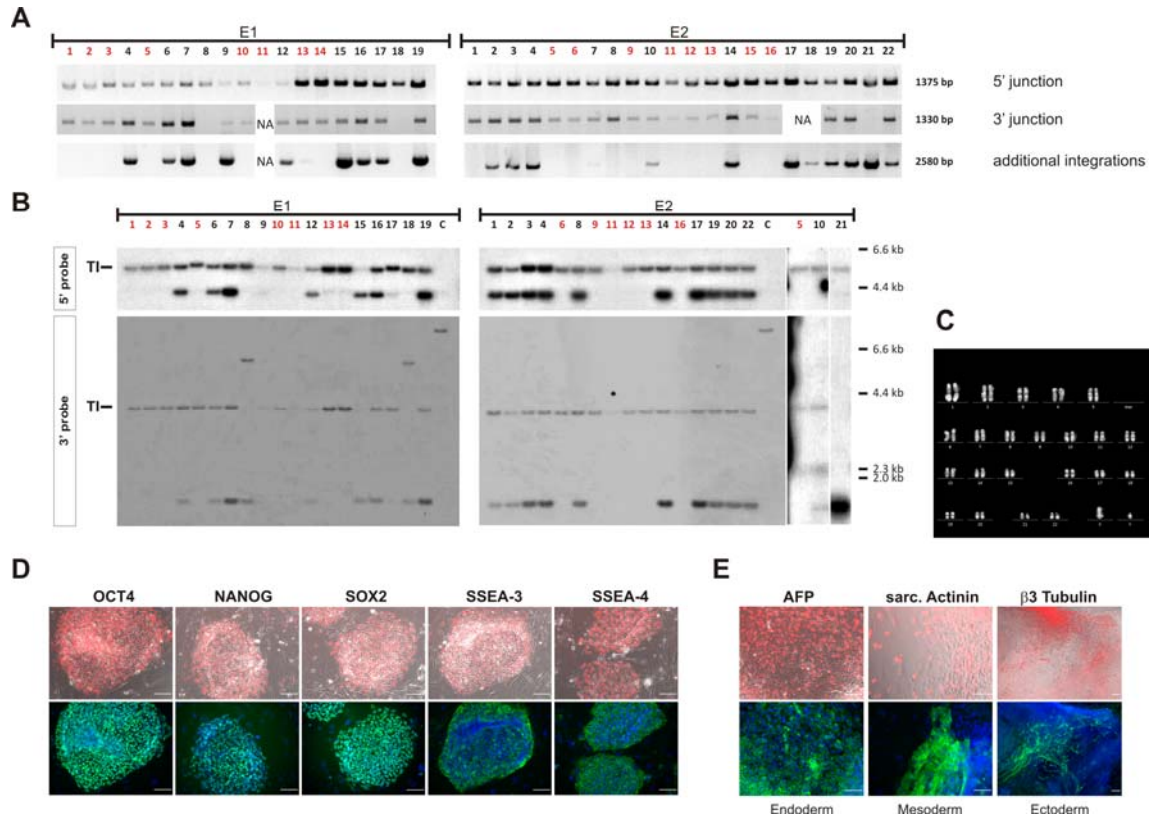

**Figure S2. Genomic analysis of eGFP<sup>neg</sup>RedStar<sup>pos</sup> human iPSC clones after eGFP-ZFN targeting and representative phenotypic characterization of one targeted iPSC clone, related to Figure 2.** The analyses of two targeting experiments (E1, E2) applying different molecular ratios of ZFNs:Donor (1:1 or 1:9) are shown. **(A)** PCR analysis for 5' (upper row, primers p3 & p4) and 3' (middle row, primers p5 & p6) junctions as expected for correct targeted integration of the donor cassette into the eGFP locus. Bands in the lower row show the presence of additional integrations, as determined using primers p7 and p8 that bind to the donor plasmid backbone outside the homologous arms. NA, not assessed. See also figure 2A. **(B)** Southern blot analysis of hiPSeGFPC7 cells targeted with eGFP-ZFN and the 2A-RedStar donor plasmid. Genomic DNA was digested with BsmI and hybridized with the internal 5' probe (on top) and internal 3' probe (below). Correctly targeted clones without additional integrations are indicated in red. The 5' probe detects a 5.2 kb targeted fragment and a 4.1 kb fragment for random donor integration. The 3' probe detects a 3.5 kb targeted fragment and a 1.4 kb fragment for random donor integration. See also figure 2A. TI, targeted integration. C, control (hCBiPS2eGFPC7). **(C)** Clone E1\_RSiPSC7 exhibits a normal karyotype (46,XY) after ZFN-mediated HR. **(D)** Assessment of pluripotency. Phase contrast images with overlay of nuclear RedStar fluorescence (upper row) and immunostaining for pluripotency markers (lower row, green) of undifferentiated E1\_RSiPSC7 (passage 13 after HR and cloning). Nuclei are stained with DAPI (blue). Scale bars represent 100  $\mu$ m. **(E)** Assessment of differentiation potential. Immunocytological detection of endodermal (AFP), mesodermal (sarc.alpha-Actinin) and ectodermal ( $\beta$ 3-Tubulin) marker proteins (green) in differentiated iPSC derivatives of clone E1\_RSiPSC7 indicates the maintenance of pluripotency. Phase contrast images with overlay of nuclear RedStar fluorescence (upper row). Nuclei are stained with DAPI (blue). Scale bars represent 100  $\mu$ m.

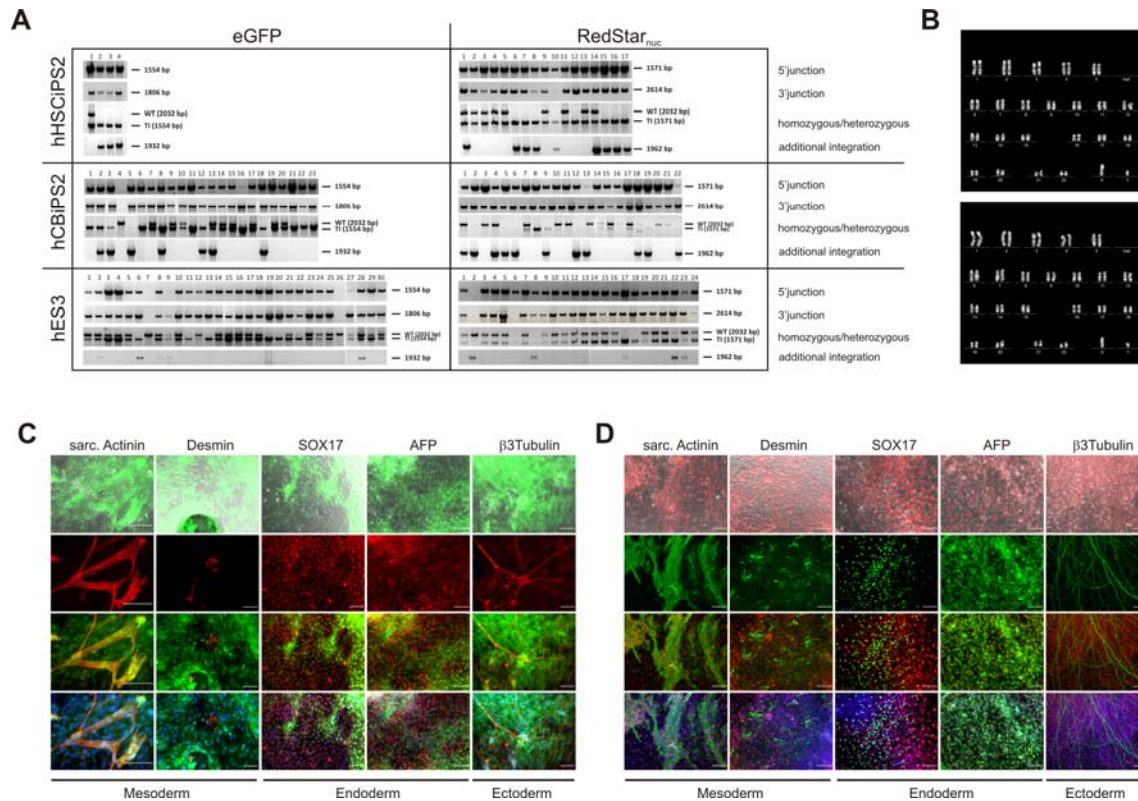

**Figure S3. Genotyping and phenotypic characterization of AAVS1 targeted iPSC clones, related to Figure 3.** (A) PCR analysis of AAVS1-targeted CAG-eGFP or CAG-RedStar transgenic hiPSC and hESC clones for the 5' (primers p9 & p10) and 3' (primers p5/p1 & p12) junctions generated by targeted integration, for the determination of homozygous (primers p9 & p10 & p12, one band) versus heterozygous (primers p9 & p10 & p12, two bands of different size) transgene integration, and for the detection of additional donor integrations (primers p10 & p13). See the scheme in figure 3A and supplemental table S1 for details. (B) Karyotype. Human iPSC clones hCBiPS2\_AAVS1eGFPC18 (upper picture) and hCBiPS2\_AAVS1RedStarC8 (lower picture) exhibit a normal karyotype (46,XY). (C) Immunostaining of clone hCBiPS2\_AAVS1eGFPC18 cell derivatives on day 24 of differentiation showed expression of mesodermal (sarc. alpha-Actinin, Desmin), endodermal (SOX17, AFP) and ectodermal ( $\beta$ 3-Tubulin) marker proteins (red). Upper pictures show eGFP transgene expression. Nuclei are stained with DAPI (blue). Scale bars represent 100  $\mu$ m. (D) Immunostaining of clone hCBiPS2\_AAVS1RedStarC8 cell derivatives on day 24 of differentiation showed expression of mesodermal (sarc. alpha-Actinin, Desmin), endodermal (SOX17, AFP) and ectodermal ( $\beta$ 3-Tubulin) marker proteins (green). The upper pictures show RedStar transgene expression. Nuclei are stained with DAPI (blue). The scale bars represent 100  $\mu$ m.

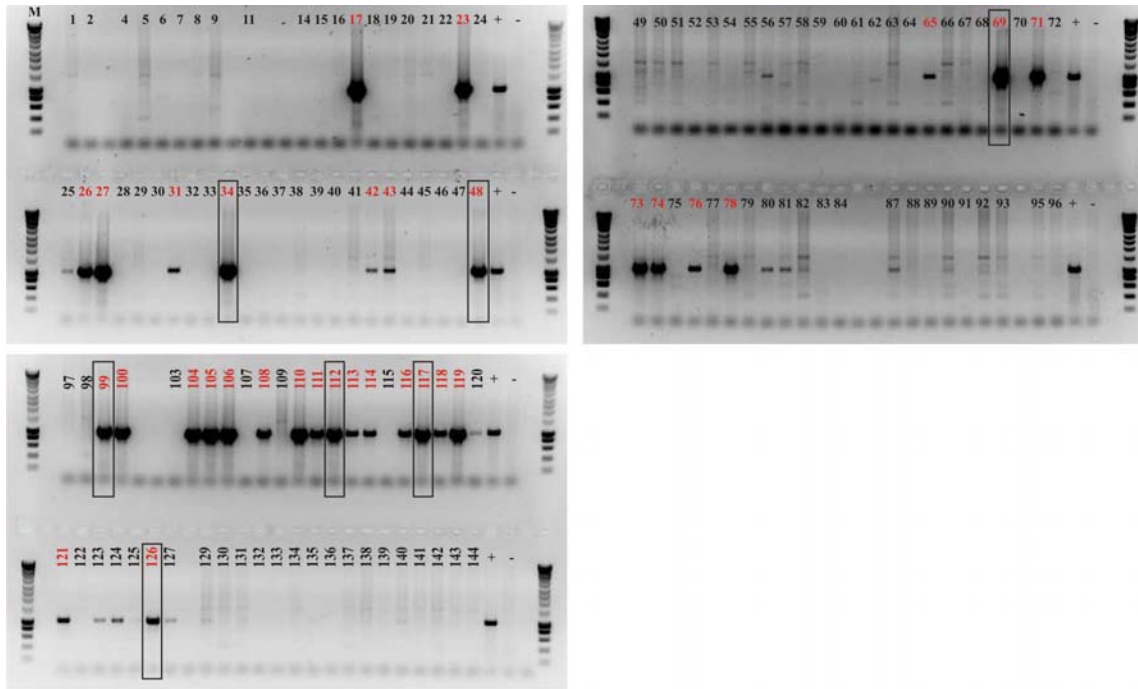

**Figure S4. PCR screening for ssODN donor integration in 144 iPSC clones, related to Figure 4.** HCBiPS2 cells were transfected with AAVS1 specific TALENs and the ssODN donor for incorporation of a HindIII site into the AAVS1 locus. On day 3 after transfection, 10 cells per well were seeded into 96 well plates. On average, one to five cells survived per well and PCR screening for targeted integration showed positive insertion of the ssODN in 32 out of 480 analysed pools (data not shown). Limiting dilution from nine positive pools resulted in 144 single cell clones. PCR analysis for the targeted integration of the ssODN revealed 33 positive clones (marked in red) from which we randomly chose 7 clones (framed) for further evaluation (see Fig. 4). M, DNA marker (Eurogentec).

**Table S1. Oligonucleotides used for PCR, related to the Experimental Procedures**

|                 | Name                       | Sequence                          | Specificity                       | Product Size           |            |
|-----------------|----------------------------|-----------------------------------|-----------------------------------|------------------------|------------|
| eGFP targeting  | p1                         | CAA CGT GCT GGT TAT TGT GC        | EGFP sequencing                   | 800 bp                 |            |
|                 | p2                         | GGC TTC ATG ATG TCC CCA TA        |                                   |                        |            |
|                 | p3                         | GTC CCC TTC TCC CTC TCC AG        | 5'junction                        | 1375 bp                |            |
|                 | p4                         | CCT GGC AAT TGG ACT TGC TTC       |                                   |                        |            |
|                 | p5                         | CAT CTG ACG GTC CAG TCA TGC       | 3'junction                        | 1330 bp                |            |
|                 | p6                         | TGT GGA ATT GTG AGC GGA TA        |                                   |                        |            |
|                 | p7                         | GCC TGA ACA CCA TAT CCA TCC       | additional integration            | 2580 bp                |            |
|                 | p8                         | GCA GCT GAG AAT ATT GTA GGA GAT C |                                   |                        |            |
| AAVS1 targeting | CAG-eGFP donor             | p9                                | CCA GCT CCC ATA GCT CAG TCT G     | 5'junction             | 1554 bp    |
|                 |                            | p10                               | ATG GGG AGA GTG AAG CAG AA        |                        |            |
|                 |                            | p11                               | GGG CAC AAG CTG GAG TAC A         | 3'junction             | 1806 bp    |
|                 |                            | p12                               | GTG AGT TTG CCA AGC AGT CA        |                        |            |
|                 |                            | p9                                | CCA GCT CCC ATA GCT CAG TCT G     | homo- vs. heterozygous | TI_1554 bp |
|                 |                            | p10                               | ATG GGG AGA GTG AAG CAG AA        |                        |            |
|                 |                            | p9                                | CCA GCT CCC ATA GCT CAG TCT G     |                        | WT_2032 bp |
|                 |                            | p12                               | GTG AGT TTG CCA AGC AGT CA        |                        |            |
|                 | p13                        | ATA ATA CCG CGC CAC ATA GC        | additional integration            | 1932 bp                |            |
|                 | p10                        | ATG GGG AGA GTG AAG CAG AA        |                                   |                        |            |
|                 | CAG-RedStar donor          | p9                                | CCA GCT CCC ATA GCT CAG TCT G     | 5'junction             | 1571 bp    |
|                 |                            | p10                               | ATG GGG AGA GTG AAG CAG AA        |                        |            |
|                 |                            | p1                                | CAA CGT GCT GGT TAT TGT GC        | 3'junction             | 2614 bp    |
|                 |                            | p12                               | GTG AGT TTG CCA AGC AGT CA        |                        |            |
|                 |                            | p9                                | CCA GCT CCC ATA GCT CAG TCT G     | homo- vs. heterozygous | TI_1571 bp |
|                 |                            | p10                               | ATG GGG AGA GTG AAG CAG AA        |                        |            |
| p9              |                            | CCA GCT CCC ATA GCT CAG TCT G     | WT_2032 bp                        |                        |            |
| p12             |                            | GTG AGT TTG CCA AGC AGT CA        |                                   |                        |            |
| p13             | ATA ATA CCG CGC CAC ATA GC | additional integration            | 1962 bp                           |                        |            |
| p10             | ATG GGG AGA GTG AAG CAG AA |                                   |                                   |                        |            |
| ssODN           | p14                        | ACA GTG GGG CCC Caa gct tG        | HindIII detection                 | 1024 bp                |            |
|                 | p12                        | GTG AGT TTG CCA AGC AGT CA        |                                   |                        |            |
|                 | p15                        | CTT GTA GGC CTG CAT CAT CA        | PCR product for HindIII digestion | 994 bp                 |            |
|                 | p16                        | GAA CAC CTA GGA CGC ACC AT        |                                   |                        |            |

**Table S2. Primary Antibodies used for immunohistology, related to the Experimental Procedures**

| <b>Name</b>              | <b>Class</b> | <b>Species</b> | <b>Clonality</b> | <b>Vendor</b>                       | <b>Dilution</b> |
|--------------------------|--------------|----------------|------------------|-------------------------------------|-----------------|
| anti-OCT4                | IgG2b        | mouse          | monoclonal       | Santa Cruz Biotechnologie, CA, USA  | 1:100           |
| anti-NANOG               | IgG1         | mouse          | monoclonal       | Abcam, Cambridge, USA               | 1:500           |
| anti-SSEA3               | IgM          | mouse          | monoclonal       | Hybridoma Bank, Iowa City, USA      | 1:100           |
| anti-SSEA4               | IgG3         | mouse          | monoclonal       | Hybridoma Bank, Iowa City, USA      | 1:70            |
| anti-sarc. alpha Actinin | IgG1         | mouse          | monoclonal       | Sigma, Missouri, USA                | 1:800           |
| anti-alpha-Fetoprotein   | IgG1         | mouse          | monoclonal       | R&D Systems, Minneapolis, USA       | 1:300           |
| anti-beta3 Tubulin       | IgG2a        | mouse          | monoclonal       | Upstate, NY, USA                    | 1:400           |
| anti-Desmin              | IgG1         | mouse          | monoclonal       | Progen, Heidelberg, DE              | 1:20            |
| anti-SOX17               | IgG          | goat           | monoclonal       | Millipore, Darmstadt, DE            | 1:200           |
| anti-TroponinT           | IgG1         | mouse          | monoclonal       | Thermo Scientific, St. Leon-Rot, DE | 1:100           |

## Supplemental Experimental Procedures

### Sequences

#### AAVS1-specific ZFN sequence (right) (with HA-tag and NLS)

MGYPYDVPDYASRPKKRKGVIHASPAAMAERPFQCRICMRNFSQSSNLARHIRTHT  
GEKPFACDICGRKFARTDYLVDHTKIHTGSQKPFQCRICMRNFSYNTHLTRHIRTHTG  
EKPFACDICGRKFAQGYNLAGHTKIHLRGSQLVKSELEEKSELRHKLKYVPHEYIEL  
IEIARNSTQDRILEMKVMEFFMKVYGYRGKHLGGSRKPDGAIYTVGSPIDYGVIVDTK  
AYSGGYNLPIGQADEMQRYVKENQTRNKHINPNEWVKVYVSSVTEFKFLFVSGHFK  
GNYKAQLTRLNHVTNCNGAVLSVEELLIGGEMIKAGTLTLEEVRKFNNGEINF-

#### AAVS1-specific ZFN sequence left (with HA-tag and NLS)

MGYPYDVPDYASRPKKRKGVIHASPAAMAERPFQCRICMRNFSYNWHLQRHIRTH  
TGEKPFACDICGRKFARSDHLTTHTKIHTGSQKPFQCRICMRNFHNYARDCHIRTHT  
GEKPFACDICGRKFAQNSTRIGHTKIHLRGSQLVKSELEEKSELRHKLKYVPHEYIEL  
IEIARNSTQDRILEMKVMEFFMKVYGYRGKHLGGSRKPDGAIYTVGSPIDYGVIVDTK  
AYSGGYNLPIGQADEMERYVEENQTRNKHANPNEWVKVYVSSVTEFKFLFVSGHFK  
GNYKAQLTRLNHITNCNGAVLSVEELLIGGEMIKAGTLTLEEVRKFNNGEINF-

#### AAVS1-specific TALEN sequence (right) (with HA-tag and NLS)

MGYPYDVPDYASRPKKRKGVIHASAPRRRAAQPSDASPAAQVDLRTLGYSSQQQQE  
KIKPKVRSSTVAQHHEALVGHGFTAHIVALSQHPAALGTVAVKYQDMIAALPEATH  
EAIVGVGKQWSGARALEALLTVAGELRGPPLQLDTGQLLKIAKRGGVTAVEAVHAW  
RNALTGAPLNLTQQVVAIASNNGGKQALETVQRLLPVLCQAHGLTPQQVVAIASHD  
GGKQALETVQRLLPVLCQAHGLTPEQVVAIASNNGGKQALETVQRLLPVLCQAHGL  
TPEQVVAIASNKGKQALETVQRLLPVLCQAHGLTPEQVVAIASNNGGKQALETVQ  
RLLPVLCQAHGLTPEQVVAIASHDGGKQALETVQRLLPVLCQAHGLTPQQVVAIASN  
IGGKQALETVQALLPVLCQAHGLTPEQVVAIASHDGGKQALETVQALLPVLCQAHG  
LTPEQVVAIASHDGGKQALETVQRLLPVLCQAHGLTPQQVVAIASNIGGKQALETVQ  
RLLPVLCQAHGLTPQQVVAIASNIGGKQALETVQRLLPVLCQAHGLTPQQVVAIASN  
GGGKQALETVQRLLPVLCQAHGLTPEQVVAIASHDGGKQALETVQRLLPVLCQAHG  
LTPEQVVAIASHDGGKQALETVQRLLPVCQAHGLTPEQVVAIASNNGGKQALETVQ  
RLLPVLCQAHGLTPEQVVAIASNNGGKQALETVQRLLPVLCQAHGLTPQQVVAIASN  
GGGKQALETVQALLPVLCQAHGLTPQQVVAIASHDGGRPALESIVAQLSRPDPALAA



LTGSQLVKSELEEKKSELRHKLKYVPHEYIELIEIARNSTQDRILEMKVMEFFMKVYG  
 YRGKHLGGSRKPDGAIYTVGSPIDYGVIVDTKAYSGGYNLPIGQADEMQRYVEENQT  
 RNKHINPNEWVKVYPSSVTEFKFLFVSGHFKGNYKAQLTRLNHITNCNGAVLSVEEL  
 LIGGEMIKAGTLTLEEVRKFNNGEINF-

AAVS1-specific TALEN sequence (left) (with HA-tag and NLS)

MGYPYDVPDYASRPKKRKGVIHASAPRRRAAQPSDASPAAQVDLRTLGYSSQQQEQE  
 KIKPKVRSTVAQHHEALVGHGFTHAHIVALSQHPAALGTVAVKYQDMIAALPEATH  
 EAIVGVGKQWSGARALEALLTVAGELRGPPLQLDTGQLLKIAKRGGVTAVEAVHAW  
 RNALTGAPLNLTPQQVVAIASHDGGKQALETVQRLLPVLCQAHGLTPQQVVAIASNG  
 GGKQALETVQRLLPVLCQAHGLTPEQVVAIASNKGKQALETVQRLLPVLCQAHGL  
 TPEQVVAIASNGGGKQALETVQRLLPVLCQAHGLTPEQVVAIASHDGGKQALETVQ  
 RLLPVLCQAHGLTPEQVVAIASHDGGKQALETVQRLLPVLCQAHGLTPQQVVAIASH  
 DGGKQALETVQALLPVLCQAHGLTPEQVVAIASHDGGKQALETVQALLPVLCQAHG  
 LTPEQVVAIASNGGGKQALETVQRLLPVLCQAHGLTPQQVVAIASHDGGKQALETV  
 QRLLPVLCQAHGLTPQQVVAIASHDGGKQALETVQRLLPVLCQAHGLTPQQVVAIAS  
 NIGGKQALETVQRLLPVLCQAHGLTPEQVVAIASHDGGKQALETVQRLLPVLCQAH  
 GLTPEQVVAIASHDGGKQALETVQRLLPVLCQAHGLTPQQVVAIASHDGGKQALET  
 VQRLLPVLCQAHGLTPEQVVAIASHDGGKQALETVQRLLPVLCQAHGLTPQQVVAIA  
 SNIGGKQALETVQALLPVLCQAHGLTPQQVVAIASHDGGKQALETVQALLPVLCQAHG  
 ALTGSQLVKSELEEKKSELRHKLKYVPHEYIELIEIARNSTQDRILEMKVMEFFMKVY  
 GYRGKHLGGSRKPDGAIYTVGSPIDYGVIVDTKAYSGGYNLPIGQADEMQRYVEEN  
 QTRNKHINPNEWVKVYPSSVTEFKFLFVSGHFKGNYKAQLTRLNHITNCNGAVLSVE  
 ELLIGGEMIKAGTLTLEEVRKFNNGEINF-

eGFP 2A-RedStar<sub>nuc</sub> donor DNA sequence

|            |             |            |            |            |                        |
|------------|-------------|------------|------------|------------|------------------------|
| TACCCCGTGC | C TTCGGGGGG | GACGGGGCAG | GGCGGGGTTT | GGCTTCTGGC |                        |
| GTGTGACCGG | CGGCTCTAGA  | GCCTCTGCTA | ACCATGTTCA | TGCCTTCTTC |                        |
| TTTTTCTAC  | AGCTCCTGGG  | CAACGTGCTG | GTTATTGTGC | TGTCTCATCA |                        |
| TTTTGGCAA  | GAATTCCTCG  | AGACCATGGT | GAGCAAGGGC | GAGGAGCTGT |                        |
| TCACCGGGGT | GGTGCCCATC  | CTGGTCGAGC | TGGACGGCGA | CGTAAACGGC |                        |
| CACAAGTTCA | GCGTGTCCGG  | CGAGGGCGAG | GGCGATGCCA | CCTACGGCAA |                        |
| GCTGACCCTG | AAGTTCATCT  | GCACCACCGG | CAAGCTGCCC | GTGCCCTGGC |                        |
| CCACCCTCGT | GACCACCCTG  | GCCTACGGCG | TGCAGTGCTT | CAGCCGCTAC | eGFP                   |
| CCCGACCACA | TGAAGCAGCA  | CGACTTCTTC | AAGTCCGCCA | TGCCCGAAGG | } homology<br>arm left |
| CTACGTCCAG | GAGCGACCA   | TCTTCTTCAA | GGACGACGGC | AACTACAAGA |                        |
| CCC CGCCGA | GGTGAAGTTC  | GAGGGCGGCA | CCCTGGTGAA | CCGCATCGAG |                        |
| CTGAAGGGCA | TCGACTTCAA  | GGAGGACGGC | AACATCCTGG | GGCACAAGCT |                        |
| GGAGTACAAC | TACAACAGCC  | ACAACGTCTA | TATCATGGCC | GACAAGCAGA |                        |

|             |            |            |            |             |                 |            |
|-------------|------------|------------|------------|-------------|-----------------|------------|
| AGAACGGCAT  | CGAGGTGAAC | TTCAAGATCC | GCCAC      | CGTGG       | TACCCCGAGA      | ZFN-L site |
| TCTGGCGGCCG | GAGAGGGCAG | AGGAAGTCTT | CTAACATGCG | GTGACGTGGA  |                 | 2Asequence |
| GGAGAATCCC  | GGCCTAGGA  | TGAGTAGATC | TTCTAAGAAC | GTCATCAAGG  |                 |            |
| AATTCATGAG  | ATTCAAGGTT | AAAATGGAAG | GTAAGTGTAA | CGGCCACGAA  |                 |            |
| TTCGAAATCG  | AAGGTGAAGG | TGAGGGTAGA | CCATATGAAG | GTCACAACAC  |                 |            |
| AGTCAAGTTG  | AAGGTACTA  | AGGGTGGTCC | ACTGCCATTC | GCTTGGGACA  |                 |            |
| TCTTGTCTCC  | ACAATCCAA  | TACGGTCTA  | AGGTCTACGT | CAAGCACCCA  |                 |            |
| GCTGACATTC  | CAGACTACAA | GAAGTTGTCC | TCCCAGAAAG | GTTTCAAGTG  |                 |            |
| GGAAAGGATC  | ATGAACTTCG | AAGACGGTGG | CGTTGTTACT | GTTACTCAAG  |                 |            |
| ACTCCTCCTT  | GCAAGACGGT | TGTTTCATCT | ACAAGGTCAA | GCTCATTGGT  |                 |            |
| GTCAACTTCC  | CATCTGACGG | TCCAGTCATG | CAAAAGAAGA | CTATGGGTTG  | RedStar nuclear |            |
| GGAAAGTCTT  | ACCGAAGGTT | TGTACCCAAG | AGACGGTGTG | TTGAAGGGTG  |                 |            |
| AAATCCACAA  | GGCCTTGAAG | TTGAAGGACG | GTGGTCACTA | C'TTGGTCGAA |                 |            |
| TTCAAGTCTA  | TCTACAAGGC | CAAGAAGCAA | GTCCAATTGC | CAGGCTATTA  |                 |            |
| CTACGTTGAC  | TCTAAGTTGG | ACATCATCTC | TCACAACGAA | GACTACACTA  |                 |            |
| TCGTGGAACA  | ATACGAACGT | ACTGAAGGTA | GACACCACTT | GTTCTTGTAC  |                 |            |
| AAGTCCACCA  | ACGAGAATGC | TAATACACCA | GCTGCCCGTC | TTCACAGATT  |                 |            |
| CAAGAACAAG  | GGAAAAGACA | GTACAGAAAT | GAGGCGTCGC | AGAATAGAGG  |                 |            |
| TCAATGTGGA  | GCTGAGGAAA | GCTAAGAAGG | ATGACCAGAT | GCTGAAGAGG  |                 |            |
| AGAAATGTAA  | GCTCATTTCC | TGATGATGCT | ACTTCTCCGC | TGCAGGAAAA  |                 |            |
| CTAAGCGGGA  | TCTTTTCCC  | TCTGCCAAAA | ATTATGGGGA | CATCATGAAG  |                 |            |
| CCCCTTGAGC  | ATCTGACTTC | TGGCTAATAA | AGGAAATTTA | TTTTCATTGC  |                 |            |
| AATAGTGTAG  | CCTAAGGTAG | GAGGACGGCA | GCGTGCAGCT | CGCCGACCAC  | ZFN-R site      |            |
| TACCAGCAGA  | ACACCCCAT  | CGGCGACGGC | CCCGTGCTGC | TGCCCGACAA  |                 |            |
| CCACTACCTG  | AGCACCCAGT | CCGCCCTGAG | CAAAGACCCC | AACGAGAAGC  |                 |            |
| GCGATCACAT  | GGTCTGCTG  | GAGTTCGTGA | CCGCCGCCGG | GATCACTCTC  |                 |            |
| GGCATGGACG  | AGCTGTACAA | GTAAGATCT  | TTTTCCCTCT | GCCAAAAATT  |                 |            |
| ATGGGGACAT  | CATGAAGCCC | CTTGAGCATC | TGACTTCTGG | CTAATAAAGG  |                 |            |
| AAATTTATTT  | TCATTGCAAT | AGTGTGTTGG | AATTTTTTGT | GTCTCTCACT  |                 |            |
| CGGAAGGACA  | TATGGGAGGG | CAAATCATT  | AAAACATCAG | AATGAGTATT  |                 |            |
| TGGTTTAGAG  | TTTGGCAACA | TATGCCCAT  | TGCTGGCTGC | CATGAACAAA  |                 |            |
| GGTTGGCTAT  | AAAGAGGTCA | TCAGTATATG | AAACAGCCCC | CTGCTGTCCA  |                 |            |
| TTCCTTATTC  | CATAGAAAAG | CCTTGACTTG | AGGTTAGATT | TTTTTTATAT  |                 |            |
| TTTGTTTTGT  | GTTATTTTTT | TCTTTAACAT | CCCTAAAATT | TTCCTTACAT  |                 |            |
| GTTTTACTAG  | CCAGATTTTT | CCTCCTCTCC | TGACTACTCC | CAGTCATAGC  |                 |            |
| TGTCCCTCTT  | CTCTTATGGA | GATCCCTCGA | CCTGCAGCCC | AAGCTTGGCG  |                 |            |
| TAATCATGGT  | CATAGCAGCC | TAA        |            |             |                 |            |

ZFN-R site

homology arm right

eGFP-2A-RedStar amino acid sequence

MVSKGEELFTGVVPIVVELDGDVNGHKFSVSGEGGDATYGLTLKFICTTGKLPVP  
WPTLTTLAYGVQCFSRYPDHMKQHDFFKSAMPEGYVQERTIFFKDDGNYKTRAEVK  
FEGGTLVNRIELKGIDFKEDGNILGHKLEYNNSHNVYIMADKQKNGIEVNFKIRHRG  
TPRSGGGEGRGSLLTCGDVEENPGPRMSRSSKNVIKEFMRFKVKMEGTVNGHEFEIE  
GEGEGRPYEGHNTVKLVTKGGPLPFAWDILSPQFQYGSKVYVVKHPADIPDYKLSF  
PEGFKWERIMNFEDGGVVTVTQDSSLQDGCFIYKVKLIGVNFPSDGPVMQKKTMGW  
EASTERLYPRDGVKGEIHKALKLKDGGHYLVEFKSIYKAKKQVQLPGYYYYVDSKL  
DIISHNEDYTIVEQYERTEGRHHLFLYKSTNENANTPAARLHRFKNKGKDSTEMRRR  
RIEVNVELRKAKKDDQMLKRRNVSSFPDDATSPLEN\*
